# Supplementary material for: Optimising drug prescribing and dispensing in subjects at risk for drug errors due to renal impairment: improving drug safety in primary healthcare by low eGFR alerts
Source: HighWire-hosted journal article supplement (doi:10.1136/bmjopen-2012-002068), 2013-01-01
Supplement: bmjopen-2012-002068supp.pdf [file bmjopen-2012-002068supp.pdf]

## SUPPLEMENTAL DATA

**Supplemental table A | Overview of medication use according to the ATC classification in the study**

| <b>ATC CLASSIFICATION</b> |                                                         | <b>Number (%)</b>  |
|---------------------------|---------------------------------------------------------|--------------------|
| <b>A</b>                  | <b>ALIMENTARY TRACT AND METABOLISM</b>                  | <b>1764 (19.1)</b> |
| <b>A01</b>                | STOMATOLOGICAL PREPARATIONS                             | 4                  |
| <b>A02</b>                | DRUGS FOR ACID RELATED DISORDERS                        | 556                |
| <b>A03</b>                | DRUGS FOR FUNCTIONAL GASTROINTESTINAL DISORDERS         | 27                 |
| <b>A04</b>                | ANTIEMETICS AND ANTINAUSEANTS                           | 15                 |
| <b>A05</b>                | BILE AND LIVER THERAPY                                  | 7                  |
| <b>A06</b>                | LAXATIVES                                               | 194                |
| <b>A07</b>                | ANTIDIARRHEALS, ANTIINFLAMMATORY/ANTIINFECTIVE          | 30                 |
| <b>A09</b>                | DIGESTIVES, INCL. ENZYMES                               | 6                  |
| <b>A10</b>                | DRUGS USED IN DIABETES                                  | 558                |
| <b>A11</b>                | VITAMINS                                                | 179                |
| <b>A12</b>                | MINERAL SUPPLEMENTS                                     | 185                |
| <b>A15</b>                | APPETITE STIMULANTS                                     | 1                  |
| <b>A16</b>                | OTHER ALIMENTARY TRACT AND METABOLISM PRODUCTS          | 2                  |
| <b>B</b>                  | <b>BLOOD AND BLOOD FORMING ORGANS</b>                   | <b>1107 (11.9)</b> |
| <b>B01</b>                | ANTITHROMBOTIC AGENTS                                   | 902                |
| <b>B02</b>                | ANTIHEMORRHAGICS                                        | 2                  |
| <b>B03</b>                | ANTIANEMIC PREPARATIONS                                 | 203                |
| <b>C</b>                  | <b>CARDIOVASCULAR SYSTEM</b>                            | <b>4064 (43.8)</b> |
| <b>C01</b>                | CARDIAC THERAPY                                         | 400                |
| <b>C02</b>                | ANTIHYPERTENSIVES                                       | 28                 |
| <b>C03</b>                | DIURETICS                                               | 1145               |
| <b>C04</b>                | PERIPHERAL VASODILATORS                                 | 1                  |
| <b>C07</b>                | BETA BLOCKING AGENTS                                    | 767                |
| <b>C08</b>                | CALCIUM CHANNEL BLOCKERS                                | 316                |
| <b>C09</b>                | AGENTS ACTING ON THE RENIN-ANGIOTENSIN SYSTEM           | 830                |
| <b>C10</b>                | LIPID MODIFYING AGENTS                                  | 577                |
| <b>D</b>                  | <b>DERMATOLOGICALS</b>                                  | <b>3 (0.03)</b>    |
| <b>G</b>                  | <b>GENITO URINARY SYSTEM AND SEX HORMONES</b>           | <b>147 (1.6)</b>   |
| <b>H</b>                  | <b>SYSTEMIC HORMONAL PREPARATIONS</b>                   | <b>254 (2.8)</b>   |
| <b>J</b>                  | <b>ANTIINFECTIVES FOR SYSTEMIC USE</b>                  | <b>165 (1.9)</b>   |
| <b>L</b>                  | <b>ANTINEOPLASTIC AND IMMUNOMODULATING AGENTS</b>       | <b>100 (1.0)</b>   |
| <b>M</b>                  | <b>MUSCULO-SKELETAL SYSTEM</b>                          | <b>312 (3.4)</b>   |
| <b>N</b>                  | <b>NERVOUS SYSTEM</b>                                   | <b>846 (9.2)</b>   |
| <b>P</b>                  | <b>ANTIPARASITIC PRODUCTS, INSECTICIDES, REPELLENTS</b> | <b>6 (0.06)</b>    |
| <b>R</b>                  | <b>RESPIRATORY SYSTEM</b>                               | <b>417 (4.6)</b>   |
| <b>S</b>                  | <b>SENSORY ORGANS</b>                                   | <b>6 (0.06)</b>    |
| <b>V</b>                  | <b>VARIOUS</b>                                          | <b>36 (0.5)</b>    |
| <b>OVERALL</b>            |                                                         | <b>9227 (100)</b>  |

**Supplemental table B | The calculated number of patients in the study setting and the change in amount of patients (workload) when applying different thresholds for eGFR-alerts**

| <b>eGFR threshold (ml/min/1.73m<sup>2</sup>)</b> | <b>Number of patients</b> | <b>Change in workload (%)</b> |
|--------------------------------------------------|---------------------------|-------------------------------|
| <b>&lt;30</b>                                    | 647                       | -47%                          |
| <b>&lt;40 (current study design)</b>             | 1369                      | <i>reference</i>              |
| <b>&lt;50</b>                                    | 2696                      | +196%                         |
| <b>&lt;60</b>                                    | 5041                      | +368%                         |

---

**Supplemental table C. Technical details of automatic laboratory alerts**

In the management database system of our laboratory the relationship and indexes of different types of data are embedded. We defined a query in this database to select our study population. This query included: test code (eGFR), ambulatory laboratory requests (excluding clinical eGFR data), and data were filtered on age  $\geq 18$ , eGFR  $\leq 45$  and zip codes of the city of Zwolle. The query was run periodically (weekly). A module matching the patients' unique Citizens Service Number (CSN) with the patient's pharmacy code was developed for this project, which enabled us to address the eGFR-alerts to the right community pharmacy. The fact that in The Netherlands patients are generally registered at one single community pharmacy (en thus have a one personal pharmacy code) facilitates this method.
